# Supplementary material for: Dried and Fermented Powders of Edible Algae (Neopyropia yezoensis) Attenuate Hepatic Steatosis in Obese Mice
Source: MDPI journal article supplement (doi:10.3390/molecules27092640), 2022-04-20
Supplement: s1 [file s1]

**Supplementary Table S1. Fatty acid contents of Nori powder and Fermented Nori powder.**

|          | Nori powder   | Fermented Nori powder |
|----------|---------------|-----------------------|
|          | (mg/g powder) |                       |
| C10:0    | 0.345±0.068   | 0.622±0.289           |
| C12:0    | 0.0362±0.0054 | 0.0279±0.0042         |
| C14:0    | 0.0947±0.0025 | 0.0668±0.0037 *       |
| C15:0    | 0.0342±0.0023 | 0.0380±0.0042         |
| C16:0    | 10.2±0.2      | 4.81±0.12 *           |
| C17:0    | 0.0239±0.0055 | 0.0382±0.0042         |
| C18:0    | 0.374±0.010   | 0.321±0.018           |
| C18:1n9c | 1.19±0.04     | 1.42±0.02 *           |
| C18:2n6  | 0.696±0.045   | 2.23±0.04 *           |
| C20:1n9  | 1.16±0.02     | 0.601±0.042 *         |
| C20:2    | 0.405±0.021   | n.d.                  |
| C20:3n6  | 0.634±0.019   | 0.237±0.038 *         |
| C20:4n6  | 0.756±0.053   | 0.262±0.037 *         |
| C20:5n3  | 19.7±0.3      | 5.87±0.6 *            |

Each value represents mean ± SE ( $n = 3$ ).

Asterisk shows significant difference at  $p < 0.05$ .

**Supplementary Table S2. Fatty acid contents of serum lipids in *db/db* mice.**

|          | Co                        | Np<br>(mg/dL)             | Fp                       |
|----------|---------------------------|---------------------------|--------------------------|
| C10:0    | 0.0845±0.0250             | 0.107±0.040               | 0.122±0.013              |
| C11:0    | 0.0232±0.0111             | 0.0430±0.0248             | 0.0532±0.0109            |
| C12:0    | 0.267±0.063               | 0.362±0.111               | 0.296±0.030              |
| C13:0    | 0.0401±0.0130             | 0.0485±0.0113             | 0.0270±0.0026            |
| C14:0    | 1.86±0.24                 | 1.81±0.17                 | 1.35±0.09                |
| C15:0    | 0.481±0.118 <sup>ab</sup> | 0.606±0.087 <sup>a</sup>  | 0.309±0.028 <sup>b</sup> |
| C16:0    | 88.6±5.0                  | 79.8±3.7                  | 78.2±4.1                 |
| C16:1    | 10.1±0.7                  | 8.30±0.59                 | 8.88±0.55                |
| C17:0    | 0.491±0.034               | 0.649±0.059               | 0.604±0.050              |
| C18:0    | 59.8±3.2 <sup>a</sup>     | 45.7±2.6 <sup>b</sup>     | 43.8±2.8 <sup>b</sup>    |
| C18:1n9t | 0.160±0.015               | 0.128±0.028               | 0.126±0.024              |
| C18:1n9c | 74.9±3.2 <sup>a</sup>     | 50.8±3.2 <sup>b</sup>     | 66.6±5.6 <sup>a</sup>    |
| C18:2n6  | 109±5                     | 106±5                     | 110±5                    |
| C18:3n6  | 1.58±0.12 <sup>a</sup>    | 1.08±0.04 <sup>b</sup>    | 1.16±0.07 <sup>b</sup>   |
| C18:3n3  | 0.533±0.077 <sup>a</sup>  | 0.948±0.155 <sup>ab</sup> | 0.969±0.091 <sup>b</sup> |
| C20:0    | 0.363±0.063               | 0.309±0.029               | 0.238±0.025              |
| C20:1n9  | 1.09±0.05 <sup>a</sup>    | 0.635±0.045 <sup>b</sup>  | 0.770±0.096 <sup>b</sup> |
| C20:2    | 0.517±0.030               | 0.508±0.020               | 0.552±0.015              |
| C20:3n6  | 13.5±1.1 <sup>a</sup>     | 6.27±0.80 <sup>b</sup>    | 7.60±0.66 <sup>b</sup>   |
| C20:4n6  | 101±10 <sup>a</sup>       | 46.2±3.5 <sup>b</sup>     | 53.5±3.4 <sup>b</sup>    |
| C20:5n3  | 1.48±0.12 <sup>a</sup>    | 24.3±1.6 <sup>b</sup>     | 8.78±0.92 <sup>c</sup>   |
| C22:0    | 0.448±0.311               | 0.118±0.007               | 0.0709±0.0062            |
| C22:6n3  | 22.5±2.2                  | 19.2±1.7                  | 18.2±1.1                 |
| C24:0    | 1.09±0.97                 | 0.158±0.013               | 0.0512±0.0078            |

Each value represents mean ± SE ( $n = 5-6$ ). Different superscript letters show significant difference at  $p < 0.05$ .

**Supplementary Table S3. Fatty acid contents of hepatic lipids in *db/db* mice.**

|         | Co                         | Np                         | Fp                          |
|---------|----------------------------|----------------------------|-----------------------------|
|         |                            | (mg/g liver)               |                             |
| C10:0   | 0.0606±0.0148              | 0.0445±0.0060              | 0.0415±0.0024               |
| C11:0   | 0.0193±0.0052              | 0.0119±0.0023              | 0.0107±0.0013               |
| C12:0   | 0.141±0.017 <sup>a</sup>   | 0.0977±0.0075 <sup>b</sup> | 0.0904±0.0036 <sup>b</sup>  |
| C13:0   | 0.0240±0.0083              | 0.0165±0.0033              | 0.0169±0.0027               |
| C14:0   | 1.81±0.14 <sup>a</sup>     | 0.824±0.097 <sup>b</sup>   | 0.798±0.088 <sup>b</sup>    |
| C15:0   | 0.0991±0.0077 <sup>a</sup> | 0.0743±0.0028 <sup>b</sup> | 0.0792±0.0075 <sup>ab</sup> |
| C16:0   | 77.7±6.3 <sup>a</sup>      | 35.9±3.9 <sup>b</sup>      | 37.4±4.2 <sup>b</sup>       |
| C17:0   | 0.131±0.007 <sup>a</sup>   | 0.106±0.005 <sup>b</sup>   | 0.114±0.003 <sup>ab</sup>   |
| C16:1   | 13.8±1.0 <sup>a</sup>      | 5.64±0.86 <sup>b</sup>     | 4.88±0.66 <sup>b</sup>      |
| C18:0   | 8.92±0.59 <sup>a</sup>     | 5.95±0.20 <sup>b</sup>     | 6.72±0.29 <sup>b</sup>      |
| C18:1n9 | 154±11 <sup>a</sup>        | 60.8±9.4 <sup>b</sup>      | 76.2±12.3 <sup>b</sup>      |
| C18:2n6 | 36.5±2.6 <sup>a</sup>      | 23.4±0.7 <sup>b</sup>      | 23.0±0.9 <sup>b</sup>       |
| C18:3n6 | 0.541±0.041 <sup>a</sup>   | 0.247±0.007 <sup>b</sup>   | 0.251±0.013 <sup>b</sup>    |
| C18:3n3 | 0.330±0.034                | 0.347±0.023                | 0.275±0.014                 |
| C20:0   | 0.185±0.038 <sup>a</sup>   | 0.0986±0.0183 <sup>b</sup> | 0.100±0.014 <sup>b</sup>    |
| C20:1n9 | 2.74±0.44 <sup>a</sup>     | 0.886±0.169 <sup>b</sup>   | 1.48±0.31 <sup>b</sup>      |
| C20:2   | 0.270±0.028                | 0.216±0.009                | 0.216±0.016                 |
| C20:3n6 | 0.859±0.061 <sup>a</sup>   | 0.599±0.043 <sup>b</sup>   | 0.789±0.039 <sup>a</sup>    |
| C20:4n6 | 3.08±0.17 <sup>a</sup>     | 2.52±0.13 <sup>b</sup>     | 3.13±0.11 <sup>a</sup>      |
| C20:5n3 | 0.0515±0.0076 <sup>a</sup> | 0.681±0.073 <sup>b</sup>   | 0.276±0.046 <sup>c</sup>    |
| C22:6n3 | 1.27±0.09 <sup>a</sup>     | 1.68±0.13 <sup>b</sup>     | 1.76±0.11 <sup>b</sup>      |

Each value represents mean ± SE ( $n = 5-6$ ). Different superscript letters show significant difference at  $p < 0.05$ .
